# Supplementary material
Source: PubMed Central journal article supplement (PMC6209314)

## Supporting Information

Label-free Proteomic Approach to Characterize Protease-dependent and Independent Effects of *sarA* Inactivation on the *Staphylococcus aureus* Exoproteome

Stephanie D. Byrum<sup>1,2#</sup>, Allister J. Loughran<sup>3#</sup>, Karen E. Beenken<sup>3#</sup>, Lisa M. Orr<sup>1</sup>, Aaron J. Storey<sup>1</sup>, Samuel G. Mackintosh<sup>1</sup>, Ricky D. Edmondson<sup>1</sup>, Alan J. Tackett<sup>1,2\*</sup> and Mark S. Smeltzer<sup>3\*</sup>

<sup>1</sup>Department of Biochemistry and Molecular Biology, University of Arkansas for Medical Sciences, 4301 West Markham Street, Little Rock, Arkansas 72205, USA

<sup>2</sup>Arkansas Children's Research Institute, 13 Children's Way, Little Rock, Arkansas 72202, USA

<sup>3</sup>Department of Microbiology and Immunology, University of Arkansas for Medical Sciences, 4301 West Markham Street, Little Rock, Arkansas 72205, USA

#Authors contributed equally; \*Co-corresponding authors

Contact author: Mark S. Smeltzer, PhD, Professor of Microbiology and Immunology, University of Arkansas for Medical Sciences, Little Rock, Arkansas 72205, USA, Email: [smeltzermarks@uams.edu](mailto:smeltzermarks@uams.edu), Office: (501) 686-7958

Table of contents:

**Figure S1.** Unsupervised hierarchical clustering of exoproteins from *S. aureus* wild-type (LAC), *sarA*, and *sarA/protease* mutants shows distinct profiles.

**Figure S2.** Total proteoform and full-length protein methods provide complementary and unique information on the presence of exoproteins.

**Table S1.** Mass spectrometric data used to identify significant proteins.

**Table S2.** All significant proteins with a p-value < 0.1 and a fold change < 1.5 (the top left quadrant of the Volcano plots from Figure 2) for each comparison in the total proteoform and full-length protein methods of analysis.

**Table S3.** All significant proteins with a p-value < 0.1 and a fold change > 1.5 (the top right quadrant of the Volcano plots from Figure 2) for each comparison in the total proteoform and full-length protein methods of analysis.

**Table S4.** Significant proteins that were uniquely identified by both the total proteoform (total counts) and the full-length protein (sum of 3 bands) methods.

**Figure S1. Unsupervised hierarchical clustering of exoproteins from *S. aureus* wild-type (LAC), *sarA*, and *sarA/protease* mutants shows distinct profiles.** Exoproteins identified by the total proteoform (A) and full-length protein (B) methods were clustered according to relative abundance. Unsupervised hierarchical clustering of the total spectral counts for significantly differentiating proteins and for each strain was performed using the Euclidean distance metric with Hierarchical Clustering Explorer (HCE, version 3.5). The count values were normalized protein by protein by the standardization method where the mean is zero and the standard deviation is 1 (Z-score).

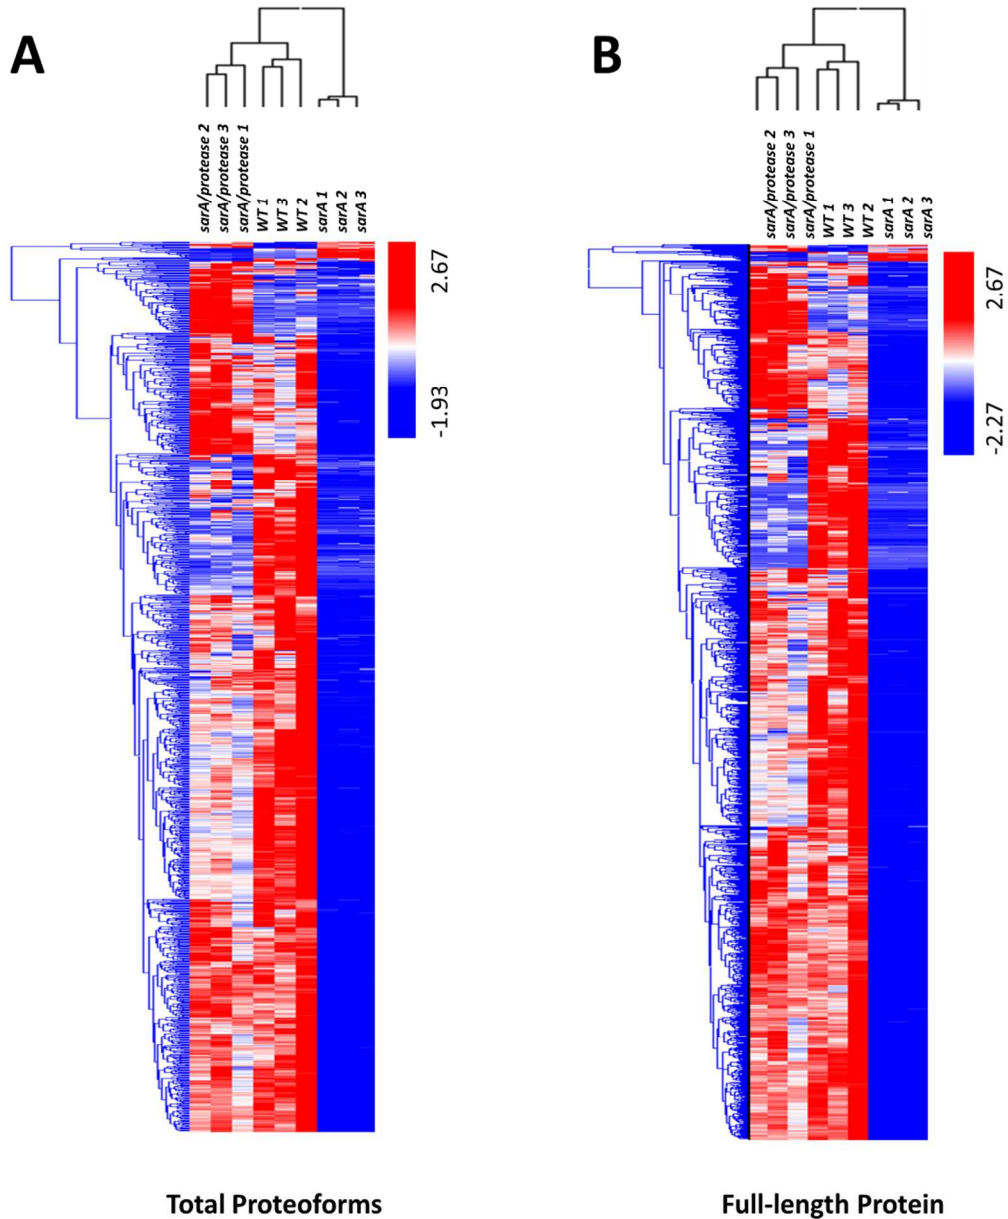

**Figure S2. Total proteoform and full-length protein methods provide complementary and unique information on the presence of exoproteins.** Venn diagrams of the number of exoproteins identified as significantly down-regulated in the *sarA* mutant compared to wild-type (A), *sarA* mutant compared to *sarA/protease* mutant (B), and wild-type compared to *sarA/protease* (C). These proteins are shown in Figure 2A-F as the red dots in the upper right quadrants of each plot.

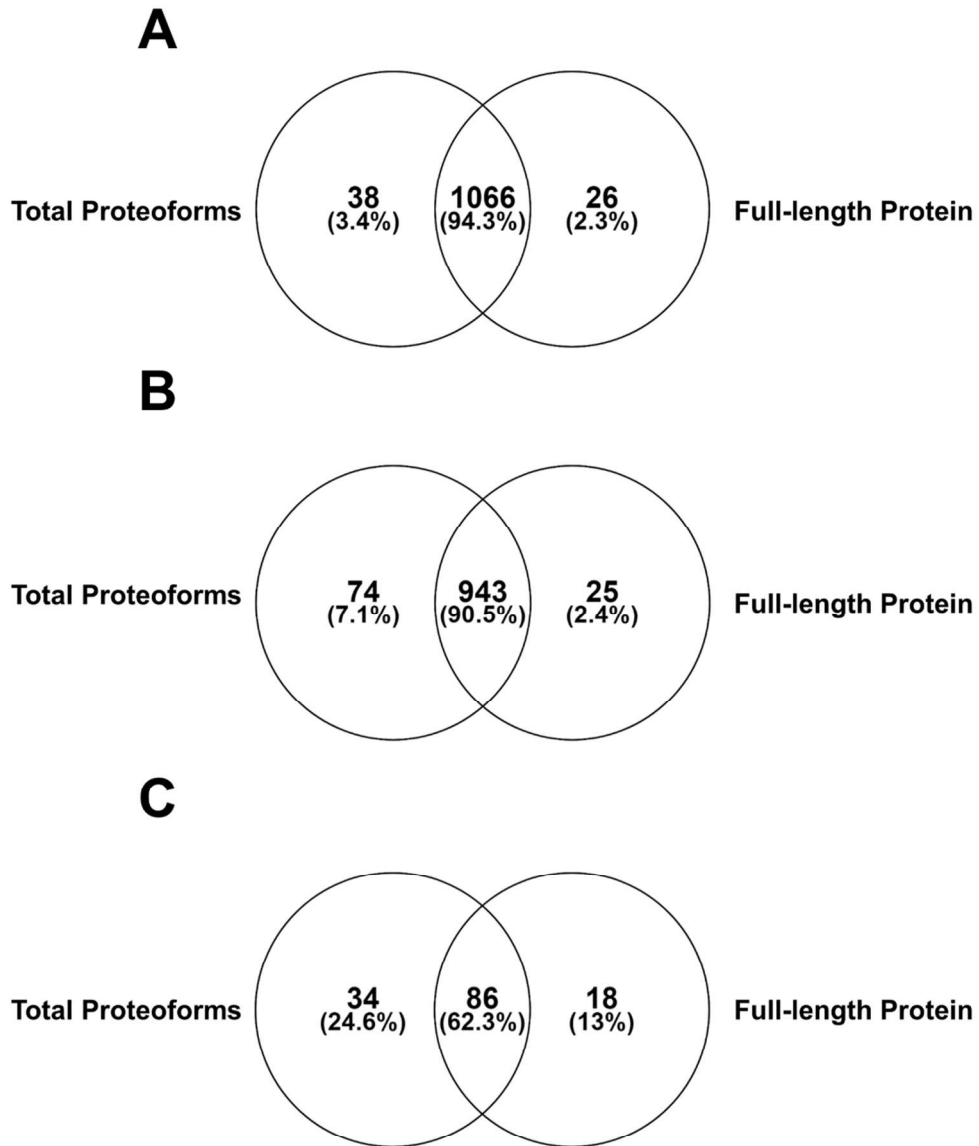

Supplement: pr8b00288_si_001.pdf [file pr8b00288_si_001.pdf]
